# Supplementary material for: Distributionally Robust Markovian Traffic Equilibrium
Source: Atypon-hosted journal article supplement (doi:10.1287/trsc.2019.0910), 2019-10-31
Supplement: trsc.2019.0910.sm1.pdf [file trsc.2019.0910.sm1.pdf]

## A Proofs

### A.1 Uniqueness of M-MDM Solution

To see the uniqueness of the solution to the M-MDM system (17)-(18), note that the right-hand-side of the M-MDM recursion (17), and hence,  $w_i^d$ , is componentwise nondecreasing in  $w_j^d, \forall j \in N_d^+(i)$ . Under Assumption A3, it is componentwise increasing. Suppose that  $\mathbf{w}^{d(1)}$  and  $\mathbf{w}^{d(2)}$  are two solutions. Let  $\delta_i^d = w_i^{d(1)} - w_i^{d(2)}$ , and let  $\delta = \max_{i \in N_d} \{\delta_i^d\} \geq 0$ . Let  $i \in N_d$  be a node where the maximum difference is attained, i.e.,  $w_i^{d(1)} - w_i^{d(2)} = \delta$ . By definition of  $\delta$ , we have  $\delta_j^d \leq \delta, \forall j \in N_d^+(i)$ . Strict monotonicity of  $w_i^d$  in  $w_j^d$  implies that  $\delta_j^d = \delta, \forall j \in N_d^+(i)$ . Moving forward in the same manner, we can show that  $\delta_j^d = \delta$  for all  $j$  reachable from node  $i$  including the destination. Then, the boundary condition implies that  $\delta = 0$ . Thus we have  $\delta_i^d = 0, \forall i \in N_d$ , implying that there is at most one solution.

### A.2 Proof of Proposition 1

*Solution.* The Lagrangian function of the formulation (20)-(22) is given below:

$$\begin{aligned} L = & \sum_{i \in N_d} h_i^d \cdot w_i^d - \sum_{i \in N_d} w_i^d \cdot n_i^d - \sum_{i \in N_d} \lambda_i^d \cdot n_i^d \\ & - \sum_{(i,j) \in A_d} n_i^d \int_{\lambda_i^d + t_{ij} + w_j^d}^{\infty} [1 - F_{ij}^d(\omega)] d\omega, \end{aligned}$$

where  $n_i^d$  is the dual variable corresponding to constraint (21). The KKT optimality conditions are as follows:

$$\begin{aligned} \frac{\partial L}{\partial \lambda_i^d} = 0 & \implies n_i^d = n_i^d \sum_{j \in N_d^+(i)} [1 - F_{ij}^d(\lambda_i^d + t_{ij} + w_j^d)], \quad \forall i \in N_d, \\ \frac{\partial L}{\partial w_i^d} = 0 & \implies n_i^d = h_i^d + \sum_{k \in N_d^-(i)} n_k^d [1 - F_{ki}^d(\lambda_k^d + t_{ki} + w_i^d)], \quad \forall i \in N_d. \end{aligned}$$

For any origin node  $o$ , i.e.,  $(o, d) \in W$ , we have  $h_o^d > 0$  and, therefore, the second KKT condition implies that  $n_o^d > 0$ . Then, the summation in the right-hand-side of the first KKT condition (for node  $o$ ) must be equal to one. In other words,  $\lambda_o^d$  solves the MDM optimality condition (15). Since MDM choice probabilities are strictly positive, there will be a positive flow

into each node that is adjacent to  $o$ . The same reasoning can be used to show that  $n_i^d > 0, \forall i \in N_d$  and to conclude that all  $\lambda_i^d$ 's solve the MDM optimality conditions (15) for all  $i \in N_d$ . The right-hand-side of constraint (21) is componentwise increasing in  $w_j^d$ . Monotonicity and the fact that we are maximizing the objective function imply that the constraint holds at equality for the optimal solution. Then, the optimal values of  $w_i^d$  and  $\lambda_i^d$  solve the M-MDM system of equations (17)-(19).  $\square$

### A.3 Proof of Lemma 1

*Solution.* Consider problem (20)-(22) where  $F_{ij}^d(t) = 0.5 + 0.5t(2 + t^2)^{-0.5}$ . In this special case, constraint (21) can be reformulated as follows:

$$\begin{aligned} 2w_i^d &\leq -2\lambda_i^d + \sum_{j \in N_d^+(i)} (a_{ij}^d - b_{ij}^d), & \forall i \in N_d, \\ a_{ij}^d &= \lambda_i^d + t_{ij} + w_j^d, & \forall (i, j) \in A_d, \\ \sqrt{a_{ij}^d + 2} &\leq b_{ij}^d, & \forall (i, j) \in A_d, \end{aligned}$$

and hence, the problem can be represented as a second-order cone programming model.  $\square$

### A.4 Derivation of Primal M-MDM Objective Function

Given the link choice probabilities, and using (23) and (24), we can express the optimal objective function value of the dual M-MDM formulation (20)-(22) as follows:

$$\begin{aligned} \sum_{i \in N_d} h_i^d \cdot w_i^d &= \sum_{i \in N_d} h_i^d \sum_{j \in N_d} \mathbf{M}_{ij}^d \cdot \underline{w}_j^d \\ &= \sum_{j \in N_d} \underline{w}_j^d \sum_{i \in N_d} h_i^d \cdot \mathbf{M}_{ij}^d \\ &= \sum_{j \in N_d} n_j^d \cdot \underline{w}_j^d \\ &= \sum_{i \in N_d} n_i^d \sum_{j \in N_d^+(i)} \left( t_{ij} \cdot p_{ij}^d - \int_{1-p_{ij}^d}^1 F_{ij}^{d(-1)}(\omega) d\omega \right) \\ &= \sum_{i \in N_d} \sum_{j \in N_d^+(i)} \left( t_{ij} \cdot x_{ij}^d - n_i^d \int_{1-\frac{x_{ij}^d}{n_i^d}}^1 F_{ij}^{d(-1)}(\omega) d\omega \right). \end{aligned}$$

## A.5 Proof of Proposition 2

*Solution.* Let  $\varphi(\mathbf{x}^d, \mathbf{n}^d) = \sum_{(i,j) \in A_d} \varphi_{ij}(x_{ij}^d, n_i^d)$  represent the objective function where:

$$\varphi_{ij}(x_{ij}^d, n_i^d) = \left( t_{ij} \cdot x_{ij}^d - n_i^d \int_{1-\frac{x_{ij}^d}{n_i^d}}^1 F_{ij}^{d(-1)}(\omega) d\omega \right).$$

This is the perspective of the function  $\varphi_{ij}^0(x)$  defined as:

$$\varphi_{ij}^0(x) = \left( t_{ij} \cdot x - \int_{1-x}^1 F_{ij}^{d(-1)}(\omega) d\omega \right),$$

such that  $\varphi_{ij}(x_{ij}^d, n_i^d) = n_i^d \varphi_{ij}^0(x_{ij}^d/n_i^d)$ . Since the function  $\varphi_{ij}^0(x)$  is strictly convex under the assumptions on the marginal distribution, the perspective of the function denoted by  $\varphi_{ij}(x_{ij}^d, n_i^d)$  is also strictly convex. This implies that  $\varphi(\mathbf{x}^d, \mathbf{n}^d)$  is strictly convex. Furthermore the constraints are convex and hence it is a convex optimization problem with a unique optimal solution. The KKT optimality conditions of the formulation are given below:

$$\frac{x_{ij}^d}{n_i^d} = 1 - F_{ij}^d \left( \lambda_i^d + t_{ij} + w_j^d \right), \quad \forall (i, j) \in A_d,$$

$$\begin{aligned} w_i^d &= -\lambda_i^d - \sum_{j \in N_d^+(i)} \left( \int_{1-\frac{x_{ij}^d}{n_i^d}}^1 F_{ij}^{d(-1)}(\omega) d\omega - \frac{x_{ij}^d}{n_i^d} F_{ij}^{d(-1)} \left( 1 - \frac{x_{ij}^d}{n_i^d} \right) \right) \\ &= -\lambda_i^d - \sum_{j \in N_d^+(i)} \int_{\lambda_i^d + t_{ij} + w_j^d}^{\infty} [1 - F_{ij}^d(\omega)] d\omega, \quad \forall i \in N_d, \end{aligned}$$

where  $\lambda_i^d$  and  $w_i^d$  are the dual variables corresponding to constraints (26) and (27), respectively. By constraint (26),  $\lambda_i^d$  satisfies the normalization condition (15). Therefore, the KKT conditions are equivalent to the MMDM system of equations.  $\square$

## A.6 Proof of Proposition 3

*Solution.* The exponential distribution satisfies the assumption on marginals, A3. Substituting the inverse cumulative distribution function  $F_{ij}^{d(-1)}(\omega) = -(1 + \ln(1 - \omega))/\beta$  in the objective function (25), the integral is calculated

as follows:

$$\int_{1-\frac{x_{ij}^d}{n_i^d}}^1 F_{ij}^{d(-1)}(\omega) d\omega = \frac{1}{\beta n_i^d} \left( -x_{ij}^d \cdot \ln x_{ij}^d + x_{ij}^d \cdot \ln n_i^d \right),$$

and the objective function simplifies to the following:

$$\sum_{(i,j) \in A_d} \left( t_{ij} \cdot x_{ij}^d + \frac{x_{ij}^d \cdot \ln x_{ij}^d}{\beta} - \frac{x_{ij}^d \cdot \ln n_i^d}{\beta} \right).$$

Constraints (26) and (27) can be expressed as a single constraint by substituting  $n_i^d$  in the objective function. Using substitution  $n_i^d = \sum_{j \in N_d^+(i)} x_{ij}^d$ , the last term in the objective function can be expressed as follows:

$$\begin{aligned} -\frac{1}{\beta} \sum_{(i,j) \in A_d} x_{ij}^d \cdot \ln n_i^d &= -\frac{1}{\beta} \sum_{i \in N_d} \sum_{j \in N_d^+(i)} x_{ij}^d \cdot \ln \left( \sum_{j \in N_d^+(i)} x_{ij}^d \right) \\ &= -\frac{1}{\beta} \sum_{i \in N_d} \left( \sum_{j \in N_d^+(i)} x_{ij}^d \right) \cdot \ln \left( \sum_{j \in N_d^+(i)} x_{ij}^d \right). \end{aligned}$$

Then, the M-MDM formulation reduces to the Markovian logit model given in (29)-(32).  $\square$

## A.7 Proof of Proposition 4

*Solution.* Let  $\lambda_i^d$ ,  $w_i^d$  and  $t_{ij}$  be the dual variables corresponding to constraints (38), (39) and (40), respectively. Then, the KKT optimality conditions of the convex optimization problem are as follows:

$$\begin{aligned} t_{ij} &= \tau_{ij}(f_{ij}), & \forall (i,j) \in A, \\ \frac{x_{ij}^d}{n_i^d} &= 1 - F_{ij}^d(\lambda_i^d + t_{ij} + w_j^d), & \forall (i,j) \in A_d, d \in D, \\ w_i^d &= -\lambda_i^d - \sum_{j \in N_d^+(i)} \int_{\lambda_i^d + t_{ij} + w_j^d}^{\infty} [1 - F_{ij}^d(\omega)] d\omega, & \forall i \in N_d, d \in D. \end{aligned}$$

The last two optimality conditions solve the M-MDM system of equations for a given link cost vector. Then, conditions (35) and (36) are satisfied since  $x_{ij}^d/n_i^d = p_{ij}(\mathbf{t})$ , where  $t_{ij} = \tau_{ij}(f_{ij})$  by the first KKT condition. Conditions

(33) and (34) are satisfied by the constraints of the model. Therefore, the optimal solution of the formulation (37)-(40) solves the MTE-MDM fixed point problem. The constraints of the model are linear, and the objective function is strictly convex and hence, the solution of the model is unique.  $\square$

## A.8 Proof of Lemma 2

*Solution.* The M-MDM recursion (17) implies that  $w_i^d \leq t_{ij} - E[\tilde{\epsilon}_{ij}^d] + w_j^d, \forall j \in N_d^+(i)$ . This inequality recursively implies that  $s_i^d$  is an upper bound for  $w_i^{d*}$ . We can make the induction assumption that  $w_i^{d(n)} \leq w_i^{d(n-1)}, \forall n \in \{1, \dots, m-1\}, i \in N_d$ , since  $w_i^{d(1)} \leq w_i^{d(0)} = s_i^d, \forall i \in N_d$ . By this assumption, we have  $t_{ij} + w_j^{d(m-1)} \leq t_{ij} + w_j^{d(m-2)}, \forall (i, j) \in A_d$ . The monotonicity of  $w_i^d$  in  $w_j^d, \forall j \in N_d^+(i)$ , then implies that  $w_i^{d(m)} \leq w_i^{d(m-1)}, \forall i \in N_d$ . By induction, the second inequality holds for all  $n$ . Thus, the sequence is monotonic nonincreasing, moreover bounded from below provided that the M-MDM solution exists. This proves that the sequence converges to the unique fixed point  $\mathbf{w}^{d*}$ .  $\square$

## A.9 Proof of Lemma 3

*Solution.* We start the proof by defining  $Y_{ai}^d(\mathbf{t}), Q_{ji}^d(\mathbf{t})$  and  $L_{ai}^d(\mathbf{t})$  as follows:

$$\begin{aligned} Y_{ai}^d(\mathbf{t}) &= \frac{\partial w_i^d(\mathbf{t})}{\partial t_a}, & \forall a \in A_d, d \in N_d, d \in D, \\ Q_{ji}^d(\mathbf{t}) &= \begin{cases} p_{ij}^d(\mathbf{t}) & \text{if } (i, j) \in A_d \\ 0 & \text{otherwise} \end{cases}, & \forall a \in A_d, d \in N_d, d \in D, \\ L_{ai}^d(\mathbf{t}) &= \begin{cases} p_a^d(\mathbf{t}) & \text{if tail of } a \text{ is } i \\ 0 & \text{otherwise} \end{cases}, & \forall a \in A_d, d \in N_d, d \in D, \end{aligned}$$

where  $p_{ij}^d(\mathbf{t}) = 1 - F_{ij}^d(\lambda_i^d(\mathbf{t}) + t_{ij} + w_j^d(\mathbf{t}))$ . Taking the derivative of the expected cost with respect to link cost, we obtain:

$$\begin{aligned} Y_{ai}^d(\mathbf{t}) &= -\frac{\partial \lambda_i^d(\mathbf{t})}{\partial t_a} + \sum_{j \in N_d^+(i)} \left( \frac{\partial \lambda_i^d(\mathbf{t})}{\partial t_a} + \frac{\partial t_{ij}}{\partial t_a} + Y_{aj}^d(\mathbf{t}) \right) \cdot p_{ij}^d(\mathbf{t}) \\ &= \sum_{j \in N_d^+(i)} \left( \frac{\partial t_{ij}}{\partial t_a} + Y_{aj}^d(\mathbf{t}) \right) \cdot p_{ij}^d(\mathbf{t}) \\ &= L_{ai}^d(\mathbf{t}) + \sum_{j \in N_d^+(i)} Y_{aj}^d(\mathbf{t}) \cdot Q_{ji}^d(\mathbf{t}). \end{aligned}$$

This leads to the linear system  $Y^d(\mathbf{t}) = L^d(\mathbf{t}) \cdot (M^d(\mathbf{t}))^\top$  where  $M^d(\mathbf{t})$  is the fundamental matrix of the absorbing Markov chain. Then, the first derivative of the objective function (45) is given by the following:

$$\begin{aligned} \frac{\partial Z(\mathbf{t})}{\partial t_a} &= \tau_a^{-1}(t_a) - \sum_{d \in D} \sum_{i \in N_d} h_i^d \cdot Y_{ai}^d(\mathbf{t}), \\ &= \tau_a^{-1}(t_a) - \sum_{d \in D} x_a^d(\mathbf{t}), \\ &= \tau_a^{-1}(t_a) - f_a(\mathbf{t}), \end{aligned} \quad \forall a \in A,$$

where  $x_a^d(\mathbf{t})$  and  $f_a(\mathbf{t})$  are the flows obtained by the stochastic network loading method (Algorithm 1) at link cost vector  $\mathbf{t}$ . This completes the proof.  $\square$
